# Supplementary material for: Cholesteric liquid crystal based polymer anti-counterfeit lamination films with broadband hyper-reflective properties and effective shielding against infrared laser beams
Source: Royal Society of Chemistry journal article supplement (doi:10.1039/d4cp04628e), 2025-01-01
Supplement: d4cp04628e2.pdf [file d4cp04628e2.pdf]

## Supporting Information

# Cholesteric Liquid Crystal Based Polymer Anti-Counterfeit Lamination Films with Broadband Hyper-Reflective Properties and Effective Shielding Against Infrared Laser Beams

Yutong Liu,<sup>a</sup> Mengqi Xie,<sup>a</sup> Yue Cao,<sup>a</sup> Zhidong Liu,<sup>a</sup> Zhou Yang,<sup>a</sup> Dong Wang,<sup>a</sup> Wanli He,<sup>a</sup> Hui Cao,<sup>\*a</sup> Huihui Wang,<sup>\*b</sup> and Guang Cui,<sup>\*c</sup>

<sup>a</sup> School of Materials Science and Engineering, University of Science and Technology Beijing, Beijing 100083, China.

<sup>b</sup> Key Laboratory of Optoelectronics Technology, Ministry of Education, Beijing University of Technology, Beijing 100124, China.

<sup>c</sup> Beijing National Laboratory for Molecular Sciences College of Chemistry and Molecular Engineering, Peking University, Beijing 100871, China.

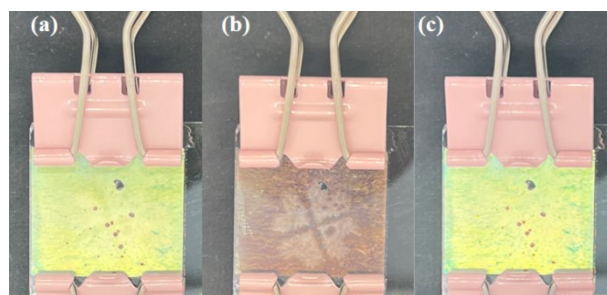

Figure S1. Photographs of samples viewed with white light (a), left polariser (b), right polariser (c), UP (D), DOWN (E1), patterning the film E1.

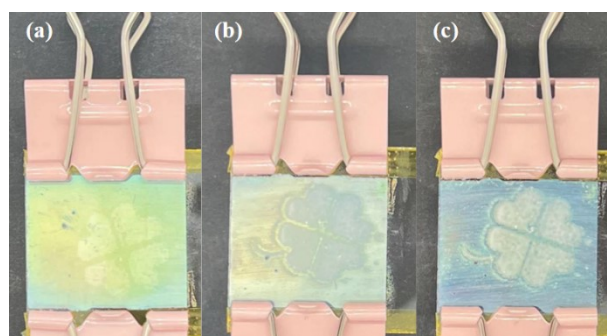

Figure S2. Photographs of samples viewed with white light (a), left polariser (b), right polariser (c), UP (D), DOWN (E1), patterning the film D.

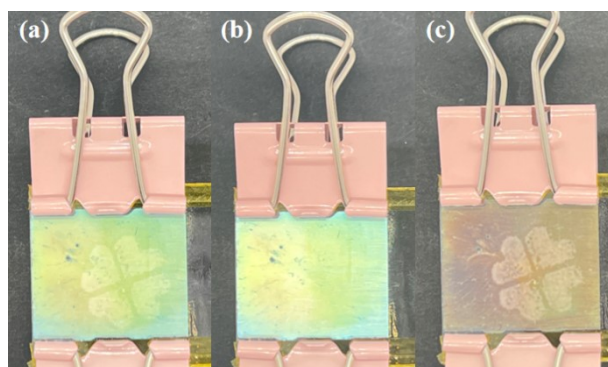

Figure S3. Photographs of samples viewed with white light (a), left polariser (b), right polariser (c), UP (E1), DOWN (D), patterning the film D.

Movie 1. The reality of reflecting polarised light of sample D-E1.
